# Supplementary material
Source: ML conference proceedings conference paper supplement (https://proceedings.neurips.cc/paper_files/paper/2018/hash/84b20b1f5a0d103f5710bb67a043cd78-Abstract.html)
Supplement: Supplementary file [file 84b20b1f5a0d103f5710bb67a043cd78-Supplemental.zip]

## A Extra Lemmas

**Lemma 8.** Let  $\mathbf{x}_1^T$  be any covariate sequence and  $\mathbf{P}_1, \dots, \mathbf{P}_T$  the associated precision matrices given by the backwards recursion (1). For any invertible matrix  $\mathbf{W} \in \mathbb{R}^{d \times d}$ , let  $\mathbf{x}'_t = \mathbf{W}\mathbf{x}_t$ . Then the precision matrices of  $\mathbf{x}'_1, \dots, \mathbf{x}'_T$  are exactly  $\mathbf{P}'_t = \mathbf{W}^\dagger^\top \mathbf{P}_t \mathbf{W}^\dagger$  and  $\mathbf{x}_t^\top \mathbf{P}_t \mathbf{x}_t = \mathbf{x}'_t{}^\top \mathbf{P}'_t \mathbf{x}'_t$ .

*Proof.* First, we can easily check that  $\mathbf{P}'_T = \left( \sum_{t=1}^T \mathbf{x}'_t \mathbf{x}'_t{}^\top \right)^\dagger = (\mathbf{W}^\top)^\dagger \left( \sum_{t=1}^T \mathbf{x}_t \mathbf{x}_t{}^\top \right)^\dagger \mathbf{W}^\dagger$ . Now, assume that the hypothesis holds for  $t$ . Then

$$\begin{aligned} \mathbf{P}'_{t-1} &= \mathbf{P}'_t + \tilde{\mathbf{P}}_t \mathbf{x}'_t \mathbf{x}'_t{}^\top \mathbf{P}'_t \\ &= \mathbf{W}^\dagger{}^\top \mathbf{P}_t \mathbf{W}^\dagger + \mathbf{W}^\dagger{}^\top \left( \mathbf{P}_t \mathbf{W}^\dagger \mathbf{W} \mathbf{x}_t \mathbf{x}_t \mathbf{W}^\top \mathbf{W}^\dagger{}^\top \mathbf{P}_t \right) \mathbf{W}^\dagger \\ &= \mathbf{W}^\dagger{}^\top \mathbf{P}_{t-1} \mathbf{W}^\dagger. \end{aligned}$$

□

## B Calculating $\Delta_t^*$

While the update of  $\mathbf{P}_t$  is given by the forward recursion, the rank one update of  $\Pi_t$  is more complicated; Sherman-Morrison cannot be used directly.

**Lemma 9.** Using  $\mathbf{x}_\perp := \mathbf{x} - \Pi_{t-1} \Pi_{t-1}^\dagger \mathbf{x}$  to denote the projection of  $\mathbf{x}_t$  onto the orthogonal complement of  $\Pi_{t-1}$ , we have

$$\Pi_t^\dagger = \begin{cases} \Pi_{t-1}^\dagger - \frac{\mathbf{x}_\perp \mathbf{x}_\perp{}^\top \Pi_{t-1}^\dagger + \Pi_{t-1}^\dagger \mathbf{x} \mathbf{x}_\perp{}^\top}{\mathbf{x}_\perp{}^\top \mathbf{x}_\perp} + \frac{\mathbf{x}_\perp \left( 1 + \mathbf{x}^\top \Pi_{t-1}^\dagger \mathbf{x} \right) \mathbf{x}_\perp{}^\top}{(\mathbf{x}_\perp{}^\top \mathbf{x}_\perp)^2} & \text{if } \mathbf{x} \notin \mathcal{C}(\Pi_{t-1}), \text{ and} \\ \Pi_{t-1}^\dagger + \frac{\Pi_{t-1}^\dagger \mathbf{x}_t \mathbf{x}_t{}^\top \Pi_{t-1}^\dagger}{1 - \mathbf{x}_t^\top \Pi_{t-1}^\dagger \mathbf{x}_t} & \text{otherwise.} \end{cases}$$

*Proof.* We will write  $\mathbf{X}$  as the matrix with columns  $\mathbf{x}_1, \dots, \mathbf{x}_{t-1}$ . Thus, we have

$$\Pi_t = \Pi_{t-1} + \mathbf{x} \mathbf{x}^\top = [\mathbf{X} \quad \mathbf{x}] \begin{bmatrix} \mathbf{X}^\top \\ \mathbf{x}^\top \end{bmatrix},$$

and since  $\mathbf{X}$  has linearly independent columns, (without loss of generality; we shall see why later),  $[\mathbf{X} \quad \mathbf{x}]$  has linearly independent columns since  $\mathbf{x}$  is not in the column space of  $\mathbf{X}$ . Therefore, we have

$$[\mathbf{X} \quad \mathbf{x}]^\dagger = \left( \begin{bmatrix} \mathbf{X}^\top \\ \mathbf{x}^\top \end{bmatrix} [\mathbf{X} \quad \mathbf{x}] \right)^{-1} \begin{bmatrix} \mathbf{X}^\top \\ \mathbf{x}^\top \end{bmatrix}$$

and

$$\Pi_t^\dagger = (\Pi_{t-1} + \mathbf{x} \mathbf{x}^\top)^\dagger = [\mathbf{X} \quad \mathbf{x}] \left( \begin{bmatrix} \mathbf{X}^\top \\ \mathbf{x}^\top \end{bmatrix} [\mathbf{X} \quad \mathbf{x}] \right)^{-2} \begin{bmatrix} \mathbf{X}^\top \\ \mathbf{x}^\top \end{bmatrix}.$$

Now, recall that the matrix that projects onto the column space of  $\mathbf{X}$  is  $\mathcal{P} := \mathbf{X} \mathbf{X}^\dagger$  and define  $\mathbf{x}_\parallel := \mathcal{P} \mathbf{x}$  and  $\mathbf{x}_\perp = \mathbf{x} - \mathbf{x}_\parallel$ . We can calculate the middle matrix by using the block matrix inversion formula:

$$\begin{aligned} \left( \begin{bmatrix} \mathbf{X}^\top \\ \mathbf{x}^\top \end{bmatrix} [\mathbf{X} \quad \mathbf{x}] \right)^{-1} &= \begin{bmatrix} (\mathbf{X}^\top \mathbf{X})^{-1} + \frac{\mathbf{X}^\dagger \mathbf{x} \mathbf{x}^\top \mathbf{X}^\dagger}{\mathbf{x}^\top \mathbf{x} - \mathbf{x}^\top \mathcal{P} \mathbf{x}} & \frac{-\mathbf{X}^\dagger \mathbf{x}}{\mathbf{x}^\top \mathbf{x} - \mathbf{x}^\top \mathcal{P} \mathbf{x}} \\ \frac{-\mathbf{x}^\top \mathbf{X}^\dagger}{\mathbf{x}^\top \mathbf{x} - \mathbf{x}^\top \mathcal{P} \mathbf{x}} & \frac{1}{\mathbf{x}^\top \mathbf{x} - \mathbf{x}^\top \mathcal{P} \mathbf{x}} \end{bmatrix} \\ &= \frac{1}{\mathbf{x}^\top \mathbf{x} - \mathbf{x}_\parallel{}^\top \mathbf{x}_\parallel} \begin{bmatrix} (\mathbf{X}^\top \mathbf{X})^{-1} \left( \mathbf{x}^\top \mathbf{x} - \mathbf{x}_\parallel{}^\top \mathbf{x}_\parallel \right) + \mathbf{X}^\dagger \mathbf{x} \mathbf{x}^\top \mathbf{X}^\dagger & -\mathbf{X}^\dagger \mathbf{x} \\ -\mathbf{x}^\top \mathbf{X}^\dagger & 1 \end{bmatrix}, \end{aligned}$$

and so

$$\left( \begin{bmatrix} \mathbf{X}^\top \\ \mathbf{x}^\top \end{bmatrix} \begin{bmatrix} \mathbf{X} & \mathbf{x} \end{bmatrix} \right)^{-1} \begin{bmatrix} \mathbf{X}^\top \\ \mathbf{x}^\top \end{bmatrix} = \frac{1}{\mathbf{x}^\top \mathbf{x} - \mathbf{x}_\parallel^\top \mathbf{x}_\parallel} \begin{bmatrix} \mathbf{X}^\dagger (\mathbf{x}^\top \mathbf{x} - \mathbf{x}_\parallel^\top \mathbf{x}_\parallel) - \mathbf{X}^\dagger \mathbf{x} \mathbf{x}_\parallel^\top \\ \mathbf{x}_\perp^\top \end{bmatrix}.$$

Using the Pythagorean theorem (i.e. that  $\mathbf{x}^\top \mathbf{x} = \mathbf{x}_\parallel^\top \mathbf{x}_\parallel + \mathbf{x}_\perp^\top \mathbf{x}_\perp$ ) and that  $\Pi_{t-1}^\dagger = \mathbf{X}^\top{}^\dagger \mathbf{X}^\dagger$ , we have

$$\begin{aligned} \Pi_t^\dagger &= \frac{1}{(\mathbf{x}_\perp^\top \mathbf{x}_\perp)^2} \begin{bmatrix} \mathbf{X}^\dagger{}^\top \mathbf{x}_\perp^\top \mathbf{x}_\perp - \mathbf{x}_\perp \mathbf{x}_\perp^\top \mathbf{X}^\top{}^\dagger & \mathbf{x}_\perp \end{bmatrix} \begin{bmatrix} \mathbf{X}^\dagger \mathbf{x}_\perp^\top \mathbf{x}_\perp - \mathbf{X}^\dagger \mathbf{x} \mathbf{x}_\perp^\top \\ \mathbf{x}_\perp^\top \end{bmatrix} \\ &= \frac{1}{(\mathbf{x}_\perp^\top \mathbf{x}_\perp)^2} \left( \Pi_{t-1}^\dagger (\mathbf{x}_\perp^\top \mathbf{x}_\perp)^2 - \mathbf{x}_\perp^\top \mathbf{x}_\perp (\mathbf{x}_\perp \mathbf{x}_\perp^\top \Pi_{t-1}^\dagger + \Pi_{t-1}^\dagger \mathbf{x} \mathbf{x}_\perp^\top) \right) \\ &\quad + \frac{\mathbf{x}_\perp \mathbf{x}_\perp^\top \Pi_{t-1}^\dagger \mathbf{x} \mathbf{x}_\perp^\top}{(\mathbf{x}_\perp^\top \mathbf{x}_\perp)^2} + \frac{\mathbf{x}_\perp \mathbf{x}_\perp^\top}{(\mathbf{x}_\perp^\top \mathbf{x}_\perp)^2} \\ &= \Pi_{t-1}^\dagger - \frac{\mathbf{x}_\perp \mathbf{x}_\perp^\top \Pi_{t-1}^\dagger + \Pi_{t-1}^\dagger \mathbf{x} \mathbf{x}_\perp^\top}{\mathbf{x}_\perp^\top \mathbf{x}_\perp} + \frac{\mathbf{x}_\perp (1 + \mathbf{x}^\top \Pi_{t-1}^\dagger \mathbf{x}) \mathbf{x}_\perp^\top}{(\mathbf{x}_\perp^\top \mathbf{x}_\perp)^2}. \end{aligned}$$

Thus, we can evaluate

$$\begin{aligned} \mathbf{x}^\top \Pi_t^\dagger \mathbf{x} &= \mathbf{x}^\top \Pi_{t-1}^\dagger \mathbf{x} - \frac{\mathbf{x}^\top \mathbf{x}_\perp \mathbf{x}_\perp^\top \Pi_{t-1}^\dagger \mathbf{x} + \mathbf{x}^\top \Pi_{t-1}^\dagger \mathbf{x} \mathbf{x}_\perp^\top \mathbf{x}}{\mathbf{x}_\perp^\top \mathbf{x}_\perp} + \frac{\mathbf{x}^\top \mathbf{x}_\perp (1 + \mathbf{x}^\top \Pi_{t-1}^\dagger \mathbf{x}) \mathbf{x}_\perp^\top \mathbf{x}}{(\mathbf{x}_\perp^\top \mathbf{x}_\perp)^2} \\ &= \mathbf{x}^\top \Pi_{t-1}^\dagger \mathbf{x} - 2\mathbf{x}^\top \Pi_{t-1}^\dagger \mathbf{x} + 1 + \mathbf{x}^\top \Pi_{t-1}^\dagger \mathbf{x} \\ &= 1, \end{aligned}$$

and

$$\begin{aligned} \mathbf{x}^\top \Pi_t^\dagger \mathbf{s} &= \mathbf{x}^\top \Pi_{t-1}^\dagger \mathbf{s} - \mathbf{x}^\top \Pi_{t-1}^\dagger \mathbf{s} - \frac{\mathbf{x}^\top \Pi_{t-1}^\dagger \mathbf{x} \mathbf{x}_\perp^\top \mathbf{s}}{\mathbf{x}_\perp^\top \mathbf{x}_\perp} + \frac{(1 + \mathbf{x}^\top \Pi_{t-1}^\dagger \mathbf{x}) \mathbf{x}_\perp^\top \mathbf{s}}{\mathbf{x}_\perp^\top \mathbf{x}_\perp} \\ &= -\frac{\mathbf{x}^\top \Pi_{t-1}^\dagger \mathbf{x} \mathbf{x}_\perp^\top \mathbf{s}}{\mathbf{x}_\perp^\top \mathbf{x}_\perp} + \frac{(1 + \mathbf{x}^\top \Pi_{t-1}^\dagger \mathbf{x}) \mathbf{x}_\perp^\top \mathbf{s}}{\mathbf{x}_\perp^\top \mathbf{x}_\perp} \\ &= 0. \end{aligned}$$

Finally, notice that

$$\mathbf{s}^\top \Pi_t^\dagger \mathbf{s} = \mathbf{s}^\top \Pi_{t-1}^\dagger \mathbf{s}$$

since  $\mathbf{x}_\perp^\top \mathbf{s} = 0$ .

The second case is a consequence of the Sherman-Morrison formula. Since  $\Pi_t$ ,  $\Pi_{t-1}$ , and  $\mathbf{x}_t$  are all in the same eigenspace, we can without loss of generality assume full rank and apply Sherman-Morrison. A precise formulation can also be found in e.g. Harville [1997].  $\square$

**Lemma 10.** For a PSD symmetric matrix  $\Pi$ ,  $\mathbf{s} \in \mathcal{R}(\Pi)$  and  $\mathbf{x} \notin \mathcal{R}(\Pi)$ , we have

$$\begin{aligned} \mathbf{x}^\top (\Pi + \mathbf{x} \mathbf{x}^\top)^\dagger \mathbf{x} &= 1, \\ \mathbf{s}^\top (\Pi + \mathbf{x} \mathbf{x}^\top)^\dagger \mathbf{x} &= 0, \\ \mathbf{s}^\top (\Pi + \mathbf{x} \mathbf{x}^\top)^\dagger \mathbf{s} &= \mathbf{s}^\top \Pi^\dagger \mathbf{s}. \end{aligned}$$

*Proof.* Write the small SVD  $\Pi = U \Lambda U^\top$  (that is, diagonal  $\Lambda$ ,  $U$  with orthonormal columns). Choose a unit vector  $v$ , vectors  $a$  and  $b$ , and scalar  $\alpha \neq 0$  so that

$$U^\top v = 0, \quad \mathbf{x} = Ua + \alpha v, \quad \mathbf{s} = Ub.$$

Define

$$w = (\Pi + xx^\top)^\dagger x, \quad r = (\Pi + xx^\top)^\dagger s.$$

Because these are the minimal norm solutions to the linear equations

$$(\Pi + xx^\top) w = x, \quad (\Pi + xx^\top) r = s,$$

we can certainly write

$$w = Uc + \beta v, \quad r = Ud + \gamma v,$$

for some vectors  $c$  and  $d$  and scalars  $\beta$  and  $\gamma$ . Then we have

$$\begin{aligned} & (U\Lambda U^\top + (Ua + \alpha v)(Ua + \alpha v)^\top)(Uc + \beta v) = Ua + \alpha v \\ \Leftrightarrow & U\Lambda c + (Ua + \alpha v)(a^\top c + \alpha\beta) = Ua + \alpha v \\ \Leftrightarrow & \Lambda c + a(a^\top c + \alpha\beta) = a, \quad \alpha(a^\top c + \alpha\beta) = \alpha, \\ \Leftrightarrow & c = 0, \quad \beta = 1/\alpha. \end{aligned}$$

Similarly,

$$\begin{aligned} & (U\Lambda U^\top + (Ua + \alpha v)(Ua + \alpha v)^\top)(Ud + \gamma v) = Ub \\ \Leftrightarrow & U\Lambda d + (Ua + \alpha v)(a^\top d + \alpha\gamma) = Ub \\ \Leftrightarrow & \Lambda d + a(a^\top d + \alpha\gamma) = b, \quad \alpha(a^\top d + \alpha\gamma) = 0, \\ \Leftrightarrow & d = \Lambda^{-1}b, \quad \gamma = -a^\top \Lambda^{-1}b/\alpha \end{aligned}$$

Thus,

$$\begin{aligned} x^\top (\Pi + xx^\top)^\dagger x &= x^\top w = (Ua + \alpha v)^\top (1/\alpha)v = 1. \\ s^\top (\Pi + xx^\top)^\dagger x &= s^\top w = (Ub)^\top (1/\alpha)v = 0. \\ s^\top (\Pi + xx^\top)^\dagger s &= s^\top r = (Ub)^\top (U\Lambda^{-1}b - a^\top \Lambda^{-1}b/\alpha) = b^\top \Lambda^{-1}b = s^\top U\Lambda^{-1}U^\top s = s^\top \Pi^\dagger s. \end{aligned}$$

□

We can also verify these calculations directly using Lemma 9, but more intuition can be gleaned from the proof above.

## C Missing Proofs

*Proof of Lemma 3.* It suffices to consider a one dimensional game. Fix some  $T$  and consider the simplest data sequence  $x_t = b$ . Applying the alternative form of  $P_t$  from (4), we can check that  $\sum_{s=1}^t x_t^\top P_t x_s \leq x_t^\top \Pi_t^{-1} \sum_{s=1}^t x_s \leq b$ , so the  $\mathcal{B}(\{B_t\})$  conditions hold. Theorem 1 implies that the minimax regret is exactly  $\sum_{t=1}^T B_t^2 x_t^\top P_t x_t \geq b^2 \sum_{t=1}^T x_t^\top P_t x_t$ .

We can explicitly write out the recursion for  $x_t^\top P_t x_t$  in this simple case. The initial value is  $x_T^\top P_T = x_T^2 / (\sum_{t=1}^T x_t^2) = T^{-1}$ , and the recursion becomes  $x_{t-1}^\top P_{t-1} = x_t^\top P_t + (x_t^\top P_t)^2$ . Denoting  $z_t = x_t^\top P_t$ , we see that  $z_T = T^{-1}$  and  $z_{t-1} = z_t + z_t^2$ . This exact recursion was analyzed in [Takimoto and Warmuth, 2000, Lemma 3], which proved that  $\sum_{t=1}^T z_t \geq \log(T) - \log \log(T)$ , which implies that, for the data sequence  $x_1, \dots, x_T = 1$ ,  $\mathcal{R} \geq b^2(\log(T) - \log \log(T))$ . Hence, for a given  $M$ , we can always find a  $T$  large enough to make  $\mathcal{R} > M$ .

The last step is to check that the  $\mathcal{A}(\Sigma)$  condition is satisfied. We exploit the fact that  $x_t^\top P_t x_t$  is scale invariant; it does not change when  $x_t$  is multiplied by any invertible matrix, as the  $P_t$  term will be pre and post-multiplied by the inverse of this matrix. This result appeared in [Bartlett et al., 2015], but we include a proof in Lemma 8 in the Appendix for completeness.

The scale invariance implies that the data sequence  $x'_t = cx_t$ , for any  $c$ , has the same regret as if the adversary played  $x_t$  with the same labels. Hence, if the  $P_0$  of  $x_t$  violates the  $\Sigma$  condition, then we may choose  $c$  large enough such that  $c^{-2}P_0$ , which is the  $P_0$  corresponding to  $x'_t$ , does not. Since the regret remains the same, and the  $\mathcal{B}$  conditions are also scale invariance, our  $x'_t$  sequence verifies the claim of the lemma. □

*Proof of Lemma 4.* We have

$$\begin{aligned}\Delta_t^* &= \sigma_t^2 - \sigma_{t-1}^2 - (\mathbf{s}_{t-1} + y_t \mathbf{x}_t)^\top \Pi_t^\dagger (\mathbf{s}_{t-1} + y_t \mathbf{x}_t) + \mathbf{s}_{t-1}^\top \Pi_{t-1}^\dagger \mathbf{s}_{t-1} \\ &= y_t^2 - 2y_t \mathbf{s}_{t-1}^\top \Pi_t^\dagger \mathbf{x}_t - y_t^2 \mathbf{x}_t^\top \Pi_t^\dagger \mathbf{x}_t + \mathbf{s}_{t-1}^\top (\Pi_{t-1}^\dagger - \Pi_t^\dagger) \mathbf{s}_{t-1}.\end{aligned}$$

First, assume that  $\mathbf{x}_\perp = 0$ . Then  $\mathbf{x}_t$  is in the column space of  $\Pi_t$  and  $\Pi_{t-1}$ , and an application of the generalized Sherman-Morrison formula (see e.g. Harville [1997]) yields

$$\Pi_{t-1}^\dagger = (\Pi_t - \mathbf{x}_t \mathbf{x}_t^\top)^\dagger = \Pi_t^\dagger + \frac{\Pi_t^\dagger \mathbf{x}_t \mathbf{x}_t^\top \Pi_t^\dagger}{1 - \mathbf{x}_t^\top \Pi_t^\dagger \mathbf{x}_t}, \quad (10)$$

and so

$$\Delta_t^* = y_t^2 \left(1 - \mathbf{x}_t^\top \Pi_t^\dagger \mathbf{x}_t\right) - 2y_t \mathbf{s}_{t-1}^\top \Pi_t^\dagger \mathbf{x}_t + \frac{\left(\mathbf{s}_{t-1}^\top \Pi_t^\dagger \mathbf{x}_t\right)^2}{1 - \mathbf{x}_t^\top \Pi_t^\dagger \mathbf{x}_t}.$$

Finally, notice that (10) implies

$$\mathbf{x}_t^\top \Pi_{t-1}^\dagger \mathbf{x}_t = \frac{\mathbf{x}_t^\top \Pi_t^\dagger \mathbf{x}_t}{1 - \mathbf{x}_t^\top \Pi_t^\dagger \mathbf{x}_t}.$$

when  $\mathbf{x}_\perp = 0$ , yielding the claim in that case.

Now, assume that  $\mathbf{x}_\perp \neq 0$ . Then

$$\begin{aligned}(\mathbf{s}_{t-1} + y_t \mathbf{x}_t)^\top \Pi_t^\dagger (\mathbf{s}_{t-1} + y_t \mathbf{x}_t) &= \mathbf{s}_{t-1}^\top \Pi_t^\dagger \mathbf{s}_{t-1} + 2y_t \mathbf{s}_{t-1}^\top \Pi_t^\dagger \mathbf{x}_t + y_t^2 \mathbf{x}_t^\top \Pi_t^\dagger \mathbf{x}_t \\ &= \mathbf{s}_{t-1}^\top \Pi_{t-1}^\dagger \mathbf{s}_{t-1} + y_t^2,\end{aligned}$$

where we applied the three claims of Lemma 10 to obtain the second equality. Therefore,  $\Delta_t^* = 0$ , and our formula is correct.  $\square$

*Proof of Theorem 4.* The proof is by induction: assume that  $W(\mathbf{s}_t, \sigma_t^2, t, \Pi_t) = \mathbf{s}_t^\top (\mathbf{P}_t - \Pi_t^\dagger) \mathbf{s}_t + \gamma_t$ . The base case is easily established with  $\gamma_T = 0$  and  $\mathbf{P}_T = \Pi_T^\dagger$  yielding the base case of  $W(\cdot, \cdot, 0, \cdot) = 0$ . Now, we assume  $W$  is correct at round  $t$  and want to verify the formula at  $t - 1$ . Hence, under the usual definitions of  $\mathbf{s}_t$  and  $\sigma_t^2$ , we can calculate

$$\begin{aligned}W(\mathbf{s}_{t-1}, \sigma_{t-1}^2, t-1, \mathbf{x}_1^T) &= \max_{e_t \in \{0,1\}} e_t \left( \min_{\hat{y}_t} \max_{y_t} (\hat{y}_t - y_t)^2 - \Delta_t^* + W(\mathbf{s}_t, \sigma_t^2, t, \mathbf{x}_1^T) \right) \\ &= \left( \min_{\hat{y}} \max_y (\hat{y} - y)^2 - y^2 \left(1 - \mathbf{x}_t^\top \Pi_t^\dagger \mathbf{x}_t\right) + 2y \mathbf{s}_{t-1}^\top \Pi_t^\dagger \mathbf{x}_t - \left(\mathbf{s}_{t-1}^\top \Pi_t^\dagger \mathbf{x}_t\right)^2 \frac{\mathbf{x}_t^\top \Pi_{t-1}^\dagger \mathbf{x}_t}{\mathbf{x}_t^\top \Pi_t^\dagger \mathbf{x}_t} \right. \\ &\quad \left. + (\mathbf{s}_{t-1} + y \mathbf{x}_t)^\top (\mathbf{P}_t - \Pi_t^\dagger) (\mathbf{s}_{t-1} + y \mathbf{x}_t) + \gamma_t \right)_+ \\ &= \left( \min_{\hat{y}} \max_y \hat{y}^2 + 2y \left(\mathbf{s}_{t-1}^\top \Pi_t^\dagger \mathbf{x}_t + \mathbf{s}_{t-1}^\top (\mathbf{P}_t - \Pi_t^\dagger) \mathbf{x}_t - \hat{y}\right) + y^2 \mathbf{x}_t^\top \Pi_t^\dagger \mathbf{x}_t \right. \\ &\quad \left. - \left(\mathbf{s}_{t-1}^\top \Pi_t^\dagger \mathbf{x}_t\right)^2 \frac{\mathbf{x}_t^\top \Pi_{t-1}^\dagger \mathbf{x}_t}{\mathbf{x}_t^\top \Pi_t^\dagger \mathbf{x}_t} + \mathbf{s}_{t-1}^\top (\mathbf{P}_t - \Pi_t^\dagger) \mathbf{s}_{t-1} + y^2 \mathbf{x}_t^\top (\mathbf{P}_t - \Pi_t^\dagger) \mathbf{x}_t + \gamma_t \right)_+ \\ &= \left( \min_{\hat{y}} \max_y \hat{y}^2 + 2y (\mathbf{s}_{t-1}^\top \mathbf{P}_t \mathbf{x}_t - \hat{y}) + y^2 \mathbf{x}_t^\top \mathbf{P}_t \mathbf{x}_t \right. \\ &\quad \left. - \left(\mathbf{s}_{t-1}^\top \Pi_t^\dagger \mathbf{x}_t\right)^2 \frac{\mathbf{x}_t^\top \Pi_{t-1}^\dagger \mathbf{x}_t}{\mathbf{x}_t^\top \Pi_t^\dagger \mathbf{x}_t} + \mathbf{s}_{t-1}^\top (\mathbf{P}_t - \Pi_t^\dagger) \mathbf{s}_{t-1} + \gamma_t \right)_+.\end{aligned}$$

The objective is convex in  $y$  and therefore the optimum will be on the boundary at  $\pm B_t$ . Thus,

$$W(s_{t-1}, \sigma_{t-1}^2, t-1, \mathbf{x}_1^T) = \left( \min_{\hat{y}} \hat{y}^2 + 2B_t |s_{t-1}^\top \mathbf{P}_t \mathbf{x}_t - \hat{y}| - B_t^2 \mathbf{x}_t^\top \mathbf{A}_t \mathbf{x}_t \right. \\ \left. - \left( s_{t-1}^\top \Pi_t^\dagger \mathbf{x}_t \right)^2 \frac{\mathbf{x}_t^\top \Pi_{t-1}^\dagger \mathbf{x}_t}{\mathbf{x}_t^\top \Pi_t^\dagger \mathbf{x}_t} + s_{t-1}^\top (\mathbf{P}_t - \Pi_t^\dagger) s_{t-1} + \gamma_t \right)_+.$$

This objective is convex in  $\hat{y}$  as well, and hence we can minimize it by setting the subgradient to zero. Under the condition that  $|s_{t-1}^\top \mathbf{B}_t \mathbf{x}_t| \leq B_t$ , the subgradient at  $\hat{y} = s_{t-1}^\top \mathbf{P}_t \mathbf{x}_t$  contains zero, so

$$W(s_{t-1}, \sigma_{t-1}^2, t-1, \mathbf{x}_1^T) = \left( (s_{t-1}^\top \mathbf{P}_t \mathbf{x}_t)^2 + B_t^2 \mathbf{x}_t^\top \mathbf{P}_t \mathbf{x}_t - \left( s_{t-1}^\top \Pi_t^\dagger \mathbf{x}_t \right)^2 \frac{\mathbf{x}_t^\top \Pi_{t-1}^\dagger \mathbf{x}_t}{\mathbf{x}_t^\top \Pi_t^\dagger \mathbf{x}_t} + s_{t-1}^\top (\mathbf{P}_t - \Pi_t^\dagger) s_{t-1} + \gamma_t \right)_+.$$

If  $\mathbf{x}_t \in \mathcal{R}(\Pi_{t-1})$ , then we can use a generalized Sherman-Morrison lemma (see Lemma 9 for details) to calculate  $\mathbf{x}_t^\top \Pi_{t-1}^\dagger \mathbf{x}_t = \frac{\mathbf{x}_t^\top \Pi_t^\dagger \mathbf{x}_t}{1 - \mathbf{x}_t^\top \Pi_t^\dagger \mathbf{x}_t}$ , and therefore

$$\left( s_{t-1}^\top \Pi_t^\dagger \mathbf{x}_t \right)^2 \frac{\mathbf{x}_t^\top \Pi_{t-1}^\dagger \mathbf{x}_t}{\mathbf{x}_t^\top \Pi_t^\dagger \mathbf{x}_t} + s_{t-1}^\top \Pi_t^\dagger s_{t-1} = s_{t-1}^\top \left( \Pi_t^\dagger \mathbf{x}_t \mathbf{x}_t^\top \Pi_t^\dagger \frac{1}{1 - \mathbf{x}_t^\top \Pi_t^\dagger \mathbf{x}_t} + \Pi_t^\dagger \right) s_{t-1} \\ = s_{t-1}^\top \Pi_{t-1}^\dagger s_{t-1}.$$

If instead  $\mathbf{x}_t \notin \mathcal{R}(\Pi_{t-1})$ , then a standard fact for the ordinary least squares solution is  $s_{t-1}^\top \Pi_t^\dagger \mathbf{x}_t = 0$  and  $s_{t-1}^\top \Pi_t^\dagger s_{t-1} = s_{t-1}^\top \Pi_{t-1}^\dagger s_{t-1}$  (a proof of this fact is provided in Lemma 10). In either case, we have

$$W(s_{t-1}, \sigma_{t-1}^2, t-1, \mathbf{x}_1^T) = \left( s_{t-1}^\top (\mathbf{P}_t + \mathbf{P}_t \mathbf{x}_t \mathbf{x}_t^\top \mathbf{P}_t) s_{t-1} + B_t^2 \mathbf{x}_t^\top \mathbf{P}_t \mathbf{x}_t - s_{t-1}^\top \Pi_{t-1}^\dagger s_{t-1} + \gamma_t \right)_+ \\ = \left( s_{t-1}^\top (\mathbf{P}_{t-1} - \Pi_{t-1}^\dagger) s_{t-1} + \gamma_{t-1} \right)_+,$$

verifying the  $\mathbf{P}_t$  and  $\gamma_t$  recurrence. If  $\gamma_{t-1} \geq s_{t-1}^\top (\Pi_{t-1}^\dagger - \mathbf{P}_{t-1}) s_{t-1}$  holds for all  $t$ , then the instantaneous value-to-go is always positive, an optimal adversary will always continue, and the data sequence seen by the learner is  $\mathbf{x}_1^T \in \bar{\mathcal{A}}(\mathbf{P}_0)$ . In this case, the minimax strategy is confirmed to be (MMS) by Theorem 2.  $\square$

*Proof of Lemma 5.* It actually suffices to take the simplest of sequences,  $\mathbf{x}_t = \mathbf{e}_1$ . For any fixed  $T$ ,  $\mathbf{P}_T = \frac{1}{T} \mathbf{e}_1 \mathbf{e}_1^\top$ , where all the  $\mathbf{P}_t$  for the remainder of the proof are with respect to the covariate sequence of  $T$  copies of  $\mathbf{e}_1$ . In this case, the  $\mathbf{P}_t$  matrices are all zero except for the first element which evolves like  $\mathbf{P}_{t-1} = \mathbf{P}_t + \mathbf{P}_t^2$ . This is the same recursion studied by Takimoto and Warmuth [2000], who proved a lower bound of  $(t + \log(T+1) - \log(t+1))^{-1}$ . Thus, we can bound

$$\sum_{t=1}^T B_t^2 \mathbf{x}_t^\top \mathbf{P}_t \mathbf{x}_t \geq \sum_{t=1}^T \frac{B_t^2}{t + \log(T+1) - \log(t+1)} \geq \sum_{t=1}^T \frac{B_t^2}{t + \log(T+1)},$$

and thus the assumption that  $\sum_{t=1}^T \frac{B_t^2}{t + \log(T+1)} \geq \gamma_0$  implies that there is an  $\mathbf{x}_1^T$  sequence that produces an upper bound on  $\gamma_0$ .

Next, notice that if we choose any index  $t'$  with  $B_{t'} \leq \|B_t\|_\infty$ , then the covariate sequence  $\mathbf{x}_t = \mathbf{e}_1 \{t = t'\}$ , where  $\{\cdot\}$  is the indicator function, produces  $\sum_{t=1}^T B_t^2 \mathbf{x}_t^\top \mathbf{P}_t \mathbf{x}_t = B_{t'}^2 \leq \gamma_0$ . Now,  $\sum_{t=1}^T B_t^2 \mathbf{x}_t^\top \mathbf{P}_t \mathbf{x}_t \leq \gamma_0$  is a continuous function of  $\mathbf{x}_1^T$ , and hence, by the intermediate value theorem, there is a  $\mathbf{x}_1^T$  with  $\sum_{t=1}^T B_t^2 \mathbf{x}_t^\top \mathbf{P}_t \mathbf{x}_t = \gamma_0$ .

Next, we check the  $\mathcal{B}$  constraint. First, observe that it suffices to check that we can construct some  $\mathbf{x}_1^T$  using the construction of the previous paragraph. On  $[0, 1/2]$ ,  $x/(1+x) \geq x/2$  and the  $\mathbf{P}_t$  sequence is decreasing, so  $\sum_{s=t+1}^T \mathbf{x}_s^2 \frac{\mathbf{x}_s^2 \mathbf{P}_s}{1 + \mathbf{x}_s^2 \mathbf{P}_s} \geq \frac{1}{2} x \sum_{s=t+1}^T \mathbf{x}_s^4 \mathbf{P}_s$ , and combined with (4), we have

$$\sum_{s=1}^t |\mathbf{x}_t^\top \mathbf{P}_s \mathbf{x}_s| \leq |\mathbf{x}_t| \frac{\sum_{s=1}^t |\mathbf{x}_s|}{\Pi_t + \sum_{s=t+1}^T \mathbf{x}_s^2 \frac{\mathbf{x}_s^2 \mathbf{P}_s}{1 + \mathbf{x}_s^2 \mathbf{P}_s}} \leq |\mathbf{x}_t| \frac{\sum_{s=1}^t |\mathbf{x}_s|}{\Pi_t + \sum_{s=t+1}^T \mathbf{x}_s^2 \frac{\mathbf{x}_s^2 \mathbf{P}_s}{2}}.$$

The arguments from the previous section show that  $\sum_{s=t+1}^T \mathbf{x}_s^2 \frac{\mathbf{x}_s^2 \mathbf{P}_s}{2}$  can be made to grow without bound (in particular, by taking  $\mathbf{x}_s = \mathbf{e}_1$ ), and so we can always find a long enough covariate sequence such that the  $\mathcal{B}$  constraint is met.

Now, fix any  $\mathbf{x}_1^T$  sequence that achieves the  $\mathcal{B}$  and  $\mathcal{C}$  constraints. By Lemma 8, we can, for any invertible matrix  $\mathbf{A}$ , rescale the covariate sequence to form  $\mathbf{x}'_t = \mathbf{A}\mathbf{x}_t$  to obtain the corresponding  $\mathbf{P}'_t = \mathbf{W}^{-1}\mathbf{P}_t\mathbf{W}^{-1}$ . Since we have  $\mathbf{x}_s^\top \mathbf{P}_t \mathbf{x}_t = \mathbf{x}'_s{}^\top \mathbf{P}'_t \mathbf{x}'_t$  for any  $s$  and  $t$ , the  $\mathcal{B}$  and  $\mathcal{C}$  constraints hold automatically. Therefore, we are free to choose  $\mathbf{A}$  such that  $\mathbf{P}'_0 = \boldsymbol{\Sigma}$ , and therefore  $\mathbf{x}_1^{T'} \in \mathcal{ABC}(\boldsymbol{\Sigma}, \gamma_0)$ .  $\square$

*Proof of Lemma 7.* Since  $\theta$  minimizes a convex unconstrained objective, we set the derivative to zero and obtain the solution  $\theta^* = \left( \sum_{s=1}^{t-1} \mathbf{x}_s \mathbf{x}_s^\top + \mathbf{R}_t \right)^{-1} \mathbf{s}_{t-1}$ . Thus, we need to verify that  $\sum_{s=1}^{t-1} \mathbf{x}_s \mathbf{x}_s^\top + \mathbf{R}_t = \mathbf{P}_t^{-1}$  for all  $t$ . This also guarantees that  $\mathbf{R}_t \succeq 0$ . The  $t = 0$  case is by definition of  $\mathbf{R}_0$ . Now, proceeding by induction, assume that the statement holds for  $t - 1$ . Then,

$$\begin{aligned} \sum_{s=1}^{t-1} \mathbf{x}_s \mathbf{x}_s^\top + \mathbf{R}_t &= \sum_{s=1}^{t-1} \mathbf{x}_s \mathbf{x}_s^\top + \mathbf{R}_{t-1} + \frac{\mathbf{x}_t \mathbf{x}_t^\top}{1 + \mathbf{x}_t^\top \mathbf{P}_t \mathbf{x}_t} - \mathbf{x}_{t-1} \mathbf{x}_{t-1}^\top \\ &= \sum_{s=1}^{t-2} \mathbf{x}_s \mathbf{x}_s^\top + \mathbf{R}_{t-1} + \frac{\mathbf{x}_t \mathbf{x}_t^\top}{1 + \mathbf{x}_t^\top \mathbf{P}_t \mathbf{x}_t} = \mathbf{P}_{t-1}^{-1} + \frac{\mathbf{x}_t \mathbf{x}_t^\top}{1 + \mathbf{x}_t^\top \mathbf{P}_t \mathbf{x}_t} = \mathbf{P}_t^{-1}, \end{aligned}$$

where the last equality is by Sherman-Morrison.  $\square$

## D Auxiliary Lemmas and Theorems

**Lemma 2** For any  $t \geq 0$ ,  $\mathbf{x}_1, \dots, \mathbf{x}_t$ , and symmetric matrix  $\mathbf{P} \succeq 0$ , the following two conditions are equivalent:

1.  $\mathbf{P}^\dagger \succeq \Pi_t$
2. For any  $T \geq t + k$ , where  $k = \text{rank}(\mathbf{P}^\dagger - \Pi_t)$ , there is a continuation of the covariate sequence,  $\mathbf{x}_{t+1}, \dots, \mathbf{x}_T$ , such that setting  $\mathbf{P}_t = \mathbf{P}$  and defining  $\mathbf{P}_{t+1}, \dots, \mathbf{P}_T$  by the forward recursion (3) gives  $\mathbf{P}_T^\dagger = \Pi_T$ .

*Proof.* To see that Condition 1 implies Condition 2, we will consider the forward algorithm recursion, starting from  $\mathbf{P}_t = \mathbf{P}$ , and show that we can find suitable covariate vectors  $\mathbf{x}_{t+1}, \dots, \mathbf{x}_{t+k}$ , so that

$$\text{rank} \left( \mathbf{P}_{t+i}^\dagger - \sum_{s=1}^{t+i} \mathbf{x}_s \mathbf{x}_s^\top \right) = k - i,$$

which implies the result for  $T = t + k$ . It suffices to show that, at each step, we can reduce this rank by one. Consider the spectral decomposition

$$\mathbf{P}^\dagger - \Pi_t = \sum_{i=1}^m \lambda_i \mathbf{v}_i \mathbf{v}_i^\top,$$

for orthonormal  $\mathbf{v}_1, \dots, \mathbf{v}_k$  and non-negative  $\lambda_1 \geq \dots \geq \lambda_k > 0$ . Choosing  $\mathbf{x}_{t+1} = \beta \mathbf{v}_k$ , there is a  $\beta \geq 0$  such that

$$\mathbf{P}_{t+1}^\dagger - \Pi_{t+1} = \sum_{i=1}^{k-1} \lambda_i \mathbf{v}_i \mathbf{v}_i^\top,$$

which implies the result. Indeed, we have

$$\begin{aligned} \mathbf{P}_{t+1}^\dagger - \Pi_{t+1} &= \mathbf{P}_t^\dagger + \frac{a_{t+1} \beta^2}{(1 - a_{t+1}) b_{t+1}^2} \mathbf{v}_k \mathbf{v}_k^\top - \Pi_t - \beta^2 \mathbf{v}_{t+1} \mathbf{v}_{t+1}^\top \\ &= \sum_{i=1}^{k-1} \lambda_i \mathbf{v}_i \mathbf{v}_i^\top + \left( \lambda_k - \beta^2 + \frac{a_{t+1} \beta^2}{(1 - a_{t+1}) b_{t+1}^2} \right) \mathbf{v}_k \mathbf{v}_k^\top. \end{aligned}$$

Recall

$$\begin{aligned}
b_{t+1}^2 &= \mathbf{x}_{t+1}^\top \mathbf{P}_t \mathbf{x}_{t+1} \\
&= \beta^2 \mathbf{v}_k^\top \left( \Pi_t + \sum_{i=1}^k \lambda_i \mathbf{v}_i \mathbf{v}_i^\top \right)^\dagger \mathbf{v}_k \\
&= \beta^2 c^2,
\end{aligned}$$

where we have defined  $c^2 > 0$ . We need to choose  $\beta \geq 0$  so that

$$\begin{aligned}
\lambda_k &= \beta^2 \left( 1 - \frac{a_{t+1}}{(1 - a_{t+1})b_{t+1}^2} \right) \\
&= \beta^2 \left( 1 - \frac{\sqrt{4b_t^2 + 1} - 1}{2b_t^2} \right) \\
&= \beta^2 \left( 1 - \frac{\sqrt{4\beta^2 c^2 + 1} - 1}{2\beta^2 c^2} \right) \\
\Leftrightarrow \quad c^2 \lambda_k &= \beta^2 c^2 - \frac{\sqrt{4\beta^2 c^2 + 1} - 1}{2}.
\end{aligned}$$

Since  $c^2 \lambda_k \geq 0$  and the function on the right hand side maps to  $[0, \infty)$  for  $\beta \geq 0$ , there is a suitable choice of  $\beta$ . To see that this implies the result for any  $T \geq t + k$ , notice that by choosing a smaller value of  $\beta$ , the rank is not diminished.

To see the other direction, notice that Condition 2 and Lemma 1 together imply that there is a  $T$  and a completion of the sequence,  $\mathbf{x}_1, \dots, \mathbf{x}_T$ , so that plugging the sequence into the backwards recurrence (1) gives  $\mathbf{P}_t = \mathbf{P}$ . But then Equation (4) shows that

$$\mathbf{P}_t^\dagger = \Pi_t + \sum_{s=t+1}^T \frac{\mathbf{x}_s^\top \mathbf{P}_s \mathbf{x}_s}{1 + \mathbf{x}_s^\top \mathbf{P}_s \mathbf{x}_s} \mathbf{x}_s \mathbf{x}_s^\top \succeq \Pi_t,$$

which is Condition 1. □

**Lemma 11.** *The definition of  $\mathbf{R}_t$  in Equation (9) is equivalent to defining  $\mathbf{R}_0 = \mathbf{P}_0^{-1}$  and*

$$\mathbf{R}_t = \mathbf{R}_{t-1} + \frac{2\mathbf{x}_t \mathbf{x}_t^\top}{\sqrt{1 + 4\mathbf{x}_t^\top \left( \mathbf{R}_{t-1} + \sum_{s=1}^{t-2} \mathbf{x}_s \mathbf{x}_s^\top \right)^{-1} \mathbf{x}_t} + 1} - \mathbf{x}_{t-1} \mathbf{x}_{t-1}^\top. \quad (11)$$

*Proof.* First, we can calculate

$$4b_t^2 = \left( \frac{2}{1 - a_t} - 1 \right)^2 - 1 = \left( \frac{1 + a_t}{1 - a_t} \right)^2 - 1 = \frac{4a_t}{(1 - a_t)^2}, \quad (12)$$

which implies that  $b_t^2 = \frac{a_t}{(1 - a_t)^2}$ . Using the forward recursion 1 of  $\mathbf{P}_t$ , we have

$$\mathbf{x}_t^\top \mathbf{P}_t \mathbf{x}_t = b_t^2 - a_t b_t^2 = \frac{a_t}{1 - a_t},$$

and

$$\frac{1}{1 + \mathbf{x}_t^\top \mathbf{P}_t \mathbf{x}_t} = 1 - a_t = \frac{2}{\sqrt{1 + 4b_t^2} + 1},$$

which, when combined  $b_t^2 = \mathbf{x}_t^\top \left( \mathbf{R}_{t-1} + \sum_{s=1}^{t-2} \mathbf{x}_s \mathbf{x}_s^\top \right)^{-1} \mathbf{x}_t$ , yields the desired statement. □

## E The Proof of the Regret Bound

This section proves Theorem 5, which is quoted below for convenience.

**Theorem 5** For any fixed  $T$  and  $B_1^T$ , we can bound the minimax regret of the box-constrained game by

$$\sup_{\mathbf{x}_1^T \in \bar{\mathcal{A}}(\Sigma)} \sup_{y_1^T \in \mathcal{L}(B_1^T)} R_T(s^*, \mathbf{x}_1^T, y_1^T) \leq \frac{d \|B_1^T\|_\infty}{\|\Sigma\|_2} \left( 1 + 2 \ln \left( 1 + \frac{\|\Sigma\|_2^2}{2 \|B_1^T\|_\infty^2} \|B_1^T\|_2^2 \right) \right).$$

The minimax analysis shows that the minimax regret is equal to  $\sup_{\mathbf{x}_1^T \in \mathcal{A}(\Sigma)} \sum_t B_t^2 \mathbf{x}_t^\top P_t \mathbf{x}_t$ , which we bound by defining the worst case regret function,

$$\phi_t(\Sigma, B_1^t) = \max_{\mathbf{x}_1, \dots, \mathbf{x}_t} \left\{ \sum_{s=1}^t B_s^2 \mathbf{x}_s^\top P_s(\mathbf{x}_1, \dots, \mathbf{x}_s) \mathbf{x}_s : \Sigma \succeq P_t(\mathbf{x}_1, \dots, \mathbf{x}_t) \sum_{s=1}^t \mathbf{x}_s \mathbf{x}_s^\top \right\}.$$

We drop the explicit dependence of  $P_t$  on  $\mathbf{x}_1^T$  and reparameterize by  $\mathbf{r}_t^2 = P_t \mathbf{x}_t \mathbf{x}_t^\top$ :

$$\phi_t(\Sigma, B_1^t) = \max_{\mathbf{r}_1, \dots, \mathbf{r}_t} \left\{ \sum_{s=1}^t B_s^2 \text{tr}(\mathbf{r}_s^2) : \Sigma \succeq P_t \sum_{s=1}^t P_s^{-1} \mathbf{r}_s^2 \right\}.$$

We then relax the optimization to allow  $\mathbf{r}_t$  to be a general matrix and argue that the worst case regret function is upper bounded by  $d$  1-dimensional functions.

Noting that  $P_{t-1} P_t^{-1} = I + P_t \mathbf{x}_t \mathbf{x}_t^\top = I + \mathbf{r}_t^2$ , we can derive an induction for  $\phi_t$ :

$$\begin{aligned} \phi_t(\Sigma, B_1^t) &= \max_{\mathbf{x}_1, \dots, \mathbf{x}_t} B_t^2 \mathbf{x}_t^\top P_t \mathbf{x}_t + \left\{ \sum_{s=1}^{t-1} B_s^2 \mathbf{x}_s^\top P_s \mathbf{x}_s : \Sigma - P_t \mathbf{x}_t \mathbf{x}_t^\top \succeq P_t \sum_{s=1}^{t-1} \mathbf{x}_s \mathbf{x}_s^\top \right\} \\ &= \max_{\mathbf{x}_1, \dots, \mathbf{x}_t} B_t^2 \mathbf{x}_t^\top P_t \mathbf{x}_t + \left\{ \sum_{s=1}^{t-1} B_s^2 \mathbf{x}_s^\top P_s \mathbf{x}_s : (\Sigma - P_t \mathbf{x}_t \mathbf{x}_t^\top) P_{t-1} P_t^{-1} \succeq P_{t-1} \sum_{s=1}^{t-1} \mathbf{x}_s \mathbf{x}_s^\top \right\} \\ &= \max_{\mathbf{r}_t, \dots, \mathbf{r}_t} B_t^2 \text{tr}(\mathbf{r}_t^2) + \left\{ \sum_{s=1}^{t-1} B_s^2 \text{tr}(\mathbf{r}_s^2) : (\Sigma - \mathbf{r}_t^2)(I + \mathbf{r}_s^2) \succeq P_{t-1} \sum_{s=1}^{t-1} \mathbf{x}_s \mathbf{x}_s^\top \right\} \\ &= \max_{\mathbf{r}_t} B_t^2 \text{tr}(\mathbf{r}_t^2) + \phi_{t-1}((\Sigma - \mathbf{r}_t^2)(I + \mathbf{r}_s^2), B_1^{t-1}). \end{aligned}$$

As a first step, we will bound  $\phi_t$  in one dimension where  $\phi_t(\Sigma, B_1^t) = \max_{r_t} B_t^2 r_t^2 + \phi_{t-1}((\Sigma - r_t^2)(1 + r_t^2), B_1^{t-1})$ . We have omitted the bolding to emphasize that we are in the scalar case. The following lemma borrows heavily from [Bartlett et al., 2015, Theorem 5]; the proof is in

**Lemma 12.** For every  $T$  and every  $B_1^T$  with  $\|B_1^T\|_\infty \leq \Sigma$ ,

$$\phi_T(\Sigma, B_1^T) \leq \min \left\{ -\ln(1 - \Sigma), 1 + 2 \log \left( 1 + \frac{\|B_1^T\|_2^2}{2} \right) \right\}.$$

*Proof.* In fact, we will prove the slightly stronger statement: for any positive function  $f(T)$  with  $f(0) \geq 0$  and  $B_{T+1}^2 e^{-f(T)/2} + f(T) \leq f(T+1)$ , we have

$$\phi_T(\Sigma, B_1^T) \leq \min\{-\ln(1 - \Sigma), f(T)\}.$$

We prove this by induction on  $T$ . The base case is trivial. Assume that the induction hypothesis holds for  $T$ . Then,

$$\begin{aligned} \phi_{T+1}(\Sigma, B_1^T) &= \max_{r_{T+1}^2} B_{T+1}^2 r_{T+1}^2 + \phi_T((\Sigma - r_t^2)(1 + r_t^2), B_1^T) \\ &= \max_{0 \leq x \leq \Sigma} B_{T+1}^2 \frac{\sqrt{(1 + \Sigma)^2 - 4x} - (1 - \Sigma)}{2} + \phi_T(x, B_1^{T-1}) \\ &\leq \max_{0 \leq x \leq \Sigma} B_{T+1}^2 \frac{\sqrt{(1 + \Sigma)^2 - 4x} - (1 - \Sigma)}{2} + \min\{-\ln(1 - x), f(T)\}. \end{aligned}$$



Define  $\hat{x} = 1 - \exp(-f(T))$ , which is where the minimum switches from the first to the second argument. To find the maximizing  $x$ , we will calculate when the derivative is positive:

$$\begin{aligned} \frac{-B_{T+1}^2}{\sqrt{(1+\Sigma)^2 - 4x}} + \frac{1}{1-x} &\geq 0 \\ \Leftrightarrow (1+\Sigma)^2 - 4x - B_{T+1}^4(1-x)^2 &\geq 0 \\ \Leftrightarrow (1+\Sigma)^2 - B_{T+1}^4(1+x)^2 + 4(B_{T+1}^4 - 1)x &\geq 0, \end{aligned} \quad (13)$$

which is true for all  $x \leq \Sigma$  and  $B^4 \leq \Sigma$ . In fact,  $B_{T+1}^4$  may be bigger than  $\Sigma$  without violating the constraint, but in particular  $B_t \leq \Sigma$  is enough.

The sign of the derivative changes at  $\hat{x}$ . If  $\Sigma \leq \hat{x}$ , then the maximum is at  $\Sigma$  and we have

$$\begin{aligned} \phi_{T+1}(\Sigma, B_1^T) &\leq B_{T+1}^2 \frac{\sqrt{(1+\Sigma)^2 - 4\Sigma} - (1-\Sigma)}{2} + \phi_T(\Sigma) \\ &= \phi_T(\Sigma). \end{aligned}$$

Otherwise, if  $\hat{x} \leq \Sigma$ , the maximum is at  $\hat{x}$  and we have

$$\begin{aligned} \phi_{T+1}(\Sigma, B_1^T) &\leq B_{T+1}^2 \frac{\sqrt{(1+\Sigma)^2 - 4\hat{x}} - (1-\Sigma)}{2} + f(T) \\ &\leq B_{T+1}^2 \sqrt{1-\hat{x}} + f(T) \\ &= B_{T+1}^2 \exp(-f(T)/2) + f(T) \end{aligned}$$

where the second line was from using  $\Sigma \leq 1$ . This allows any  $f(T)$  that satisfies

$$B_{T+1}^2 e^{-f(T)/2} + f(T) \leq f(T+1).$$

To check that  $f(T) = 1 + 2 \log(1 + 1/2 \sum_t B_t^2)$  indeed works, we calculate:

$$\begin{aligned} f(T+1) - f(T) &= -2 \log \left( \frac{2 + \sum_{t=1}^T B_t^2}{2 + \sum_{t=1}^{T+1} B_t^2} \right) \\ &= -2 \log \left( 1 - \frac{B_{T+1}^2}{2 + \sum_{t=1}^{T+1} B_t^2} \right) \\ &\geq \frac{B_{T+1}^2}{1 + \frac{1}{2} \sum_{t=1}^{T+1} B_t^2} \\ &\geq e^{-1/2} \frac{B_{T+1}^2}{1 + \frac{1}{2} \sum_{t=1}^{T+1} B_t^2} \\ &= B_{T+1}^2 e^{-f(T)/2}. \end{aligned}$$

□

The general multidimensional case can be bounded by first relaying the assumption that  $\mathbf{r}_t^2 = \mathbf{P}_t \mathbf{x}_t \mathbf{x}_t^\top$  to allow general matrices  $\mathbf{R}_t$ , which only increases the value of the maximization. We can then apply the one-dimensional bound in every direction:

**Lemma 13.** *For any  $\Sigma \geq 0$ ,  $\psi_t(\Sigma \mathbf{I}, B_1^t) = \sum_{i=1}^d \phi_t(\Sigma, B_1^t)$ , where  $\phi_t(\Sigma)$  is the one-dimensional regret bound.*

*Proof.* The base case is trivial since both sides are zero. For the inductive hypothesis, assume that  $\psi_{t-1}(\Sigma \mathbf{I}, B_1^{t-1}) = \sum_{i=1}^d \phi_{t-1}(\Sigma, B_1^{t-1})$ . Denoting the eigenvalues of  $\mathbf{R}$  by  $\lambda_1, \dots, \lambda_d$ , we have

$$\begin{aligned} \psi_t(\Sigma \mathbf{I}, B_1^t) &= \max_{\mathbf{R}} B_t^2 \text{tr}(\mathbf{R}) + \psi_{t-1}((\Sigma \mathbf{I} - \mathbf{R})(\mathbf{I} + \mathbf{R}), B_1^{t-1}) \\ &= \max_{\mathbf{R}} \left\{ \sum_{i=1}^d \lambda_i + \sum_{i=1}^d \phi_{t-1}((1+\lambda_i)(\Sigma - \lambda_i), B_1^{t-1}) \right\} = \sum_{i=1}^d \phi_t(\Sigma, B_1^t). \end{aligned}$$

□

*Proof of Theorem 5.* Recall from Theorem 1 that for given  $T$  and  $\mathbf{x}_1, \dots, \mathbf{x}_T$ , the regret of the box constrained game is precisely  $\sum_{t=1}^T B_t^2 \mathbf{x}_t^\top \mathbf{P}_t \mathbf{x}_t$ . Lemma 13 bounds  $\sum_{t=1}^T B_t^2 \mathbf{x}_t^\top \mathbf{P}_t \mathbf{x}_t$  by a quantity that does not depend on  $\mathbf{x}_t$ . To invoke Lemma 12, we need that  $B_t \leq \max_i \lambda_i$  for all  $t$ , which is exactly  $\|B_1^T\|_\infty \leq \|\Sigma\|_2$ . Rescaling the  $B_t$  sequence (and hence the regret bound) gives the result.  $\square$

## F Explicit Constraints on $\mathbf{x}_t$

We have seen that the learner is minimax as long as the adversary plays a covariate sequence that is in  $\mathcal{A}(\Sigma)$ . The following theorem provides explicit constraints on the choice of  $\mathbf{x}_{t+1}$  as a function of the past covariates.

**Theorem 6.** *The consistency condition*

$$\mathbf{P}_{t+1}^{-1} - \sum_{q=1}^{t+1} \mathbf{x}_q \mathbf{x}_q^\top \succeq 0$$

is equivalent to the conjunction of

1.  $\mathbf{P}_t^{-1} - \sum_{q=1}^t \mathbf{x}_q \mathbf{x}_q^\top \succeq 0$ ,
2.  $\mathbf{x}_{t+1}$  is orthogonal to the kernel of  $\mathbf{P}_t^{-1} - \sum_{q=1}^t \mathbf{x}_q \mathbf{x}_q^\top$ , and
3.  $\mathbf{x}_{t+1}^\top \mathbf{P}_t \mathbf{x}_{t+1} \leq d_t(\hat{\mathbf{x}}_{t+1}) + \sqrt{d_t(\hat{\mathbf{x}}_{t+1})}$ ,

where  $\hat{\mathbf{x}}_{t+1} = \mathbf{x}_{t+1} / \|\mathbf{x}_{t+1}\|$  and

$$d_t(\hat{\mathbf{x}}) = \frac{\hat{\mathbf{x}}^\top \mathbf{P}_t \hat{\mathbf{x}}}{\hat{\mathbf{x}}^\top \left( \mathbf{P}_t^{-1} - \sum_{q=1}^t \mathbf{x}_q \mathbf{x}_q^\top \right)^\dagger \hat{\mathbf{x}}}.$$

Notice that  $0 \leq d_t(\hat{\mathbf{x}}) \leq 1$ .

*Proof.* The  $\mathbf{x}_{t+1}$  must satisfy

$$\mathbf{P}_t^{-1} - \sum_{q=1}^t \mathbf{x}_q \mathbf{x}_q^\top - \left( 1 - \frac{a_t}{(1-a_t)b_t^2} \right) \mathbf{x}_{t+1} \mathbf{x}_{t+1}^\top \succeq 0.$$

Since

$$1 - \frac{a_t}{(1-a_t)b_t^2} \geq 0,$$

the Schur complement characterization of symmetric positive semidefinite matrices shows that this is equivalent to the conjunction of

1.  $\mathbf{P}_t^{-1} - \sum_{q=1}^t \mathbf{x}_q \mathbf{x}_q^\top \succeq 0$ ,
2.  $\mathbf{x}_{t+1}$  orthogonal to the kernel of  $\mathbf{P}_t^{-1} - \sum_{q=1}^t \mathbf{x}_q \mathbf{x}_q^\top$ , and
3.  $\left( 1 - \frac{a_t}{(1-a_t)b_t^2} \right) \mathbf{x}_{t+1}^\top \left( \mathbf{P}_t^{-1} - \sum_{q=1}^t \mathbf{x}_q \mathbf{x}_q^\top \right)^\dagger \mathbf{x}_{t+1} \leq 1$ .

Conditions (1) and (2) are (1) and (2).

Writing  $\mathbf{x}_{t+1} = c\hat{\mathbf{x}}_{t+1}$ , we see that

$$b_t^2 = \mathbf{x}_{t+1}^\top \mathbf{P}_t \mathbf{x}_{t+1} = c^2 \hat{\mathbf{x}}_{t+1}^\top \mathbf{P}_t \hat{\mathbf{x}}_{t+1},$$

so Condition (3) is equivalent to

$$\begin{aligned}
& \left(1 - \frac{a_t}{(1-a_t)b_t^2}\right) c^2 \leq \frac{1}{\hat{\mathbf{x}}_{t+1}^\top \left(\mathbf{P}_t^{-1} - \sum_{q=1}^t \mathbf{x}_q \mathbf{x}_q^\top\right)^\dagger \hat{\mathbf{x}}_{t+1}} \\
\Leftrightarrow & \left(1 - \frac{a_t}{(1-a_t)b_t^2}\right) b_t^2 \leq \frac{\hat{\mathbf{x}}_{t+1}^\top \mathbf{P}_t \hat{\mathbf{x}}_{t+1}}{\hat{\mathbf{x}}_{t+1}^\top \left(\mathbf{P}_t^{-1} - \sum_{q=1}^t \mathbf{x}_q \mathbf{x}_q^\top\right)^\dagger \hat{\mathbf{x}}_{t+1}} \\
\Leftrightarrow & \left(1 - \frac{a_t}{(1-a_t)b_t^2}\right) b_t^2 \leq d_t(\hat{\mathbf{x}}_{t+1}).
\end{aligned}$$

Finally, it is straightforward to check that the function  $\phi$  defined by

$$\phi(b_t^2) := \left(1 - \frac{a_t}{(1-a_t)b_t^2}\right) b_t^2$$

satisfies

$$\phi(b_t^2) = b_t^2 - \frac{\sqrt{4b_t^2 + 1} - 1}{2},$$

and that  $\phi(b_t^2) \leq \alpha$  iff  $b_t^2 \leq \alpha + \sqrt{\alpha}$ . Combining shows that Condition (3) is equivalent to Condition (3).  $\square$

## G Calculating the Minimax Directly

As a step in justifying our  $ABC$  assumptions we show that trying to directly calculate the full minimax game is hopeless.

**Lemma 14.** *If we impose the box constraints  $|\mathbf{x}_T^\top \mathbf{P}_T \mathbf{s}_{T-1}| \leq B_T$  on  $\mathbf{x}_T$ , the first step of the backwards induction evaluates to*

$$\begin{aligned}
& \max_{\mathbf{x}_T} \min_{\hat{\mathbf{y}}_T} \max_{\mathbf{y}_T} \mathbf{s}_T^\top \mathbf{P}_T \mathbf{s}_T - \sigma_T^2 \\
& = \mathbf{s}_{T-1}^\top \Pi_{T-1}^\dagger \mathbf{s}_{T-1} - \sigma_{T-1}^2 \\
& + \begin{cases} \alpha_T^* \frac{\mathbf{s}_{T-1}^\top \Pi_{T-1}^\dagger \mathbf{s}_{T-1} + (\mathbf{s}_{T-1}^\top \Pi_{T-1}^\dagger \mathbf{s}_{T-1} + B_T^2 \alpha_T^*) (1 - (\alpha_T^*)^2 \mathbf{s}_{T-1}^\top \Pi_{T-1}^\dagger \mathbf{s}_{T-1})}{(1 - (\alpha_T^*)^2 \mathbf{s}_{T-1}^\top \Pi_{T-1}^\dagger \mathbf{s}_{T-1})^2} & \text{if } \Pi_{T-1} \text{ is full rank} \\ \max \left\{ B_T^2, \alpha_T^* \frac{\mathbf{s}_{T-1}^\top \Pi_{T-1}^\dagger \mathbf{s}_{T-1} + (\mathbf{s}_{T-1}^\top \Pi_{T-1}^\dagger \mathbf{s}_{T-1} + B_T^2 \alpha_T^*) (1 - (\alpha_T^*)^2 \mathbf{s}_{T-1}^\top \Pi_{T-1}^\dagger \mathbf{s}_{T-1})}{(1 - (\alpha_T^*)^2 \mathbf{s}_{T-1}^\top \Pi_{T-1}^\dagger \mathbf{s}_{T-1})^2} \right\} & \text{otherwise.} \end{cases}
\end{aligned}$$

This lemma makes the point that the full minimax formulation leads to an intractable backwards induction, even from the first step.

*Proof.* We prove this lemma by direct calculation. For a given  $\mathbf{x}_T$ , we have already evaluated the  $\min_{\hat{\mathbf{y}}_T} \max_{\mathbf{y}_T}$  argument using the backwards induction under the condition that  $|\mathbf{x}_T^\top \mathbf{P}_T \mathbf{s}_{T-1}| \leq B_T$ . Hence, the above quantity is equal to

$$\max_{\mathbf{x}_T} \mathbf{s}_{T-1}^\top \mathbf{P}_{T-1} \mathbf{s}_{T-1} - \sigma_{T-1}^2 + B_T^2 \mathbf{x}_T^\top \mathbf{P}_T \mathbf{x}_T. \quad (14)$$

Next, we extract the  $\mathbf{x}_T$  dependence from  $\mathbf{P}_T$ . Using  $\mathbf{P}_{T-1} = \mathbf{P}_T + \mathbf{P}_T \mathbf{x}_T \mathbf{x}_T^\top \mathbf{P}_T$  and  $\mathbf{P}_T = (\Pi_{T-1} + \mathbf{x}_T \mathbf{x}_T^\top)^\dagger$ , we have

$$\begin{aligned}
\mathbf{P}_{T-1} & = \mathbf{P}_T + \mathbf{P}_T \mathbf{x}_T \mathbf{x}_T^\top \mathbf{P}_T \\
& = (\Pi_{T-1} + \mathbf{x}_T \mathbf{x}_T^\top)^\dagger + (\Pi_{T-1} + \mathbf{x}_T \mathbf{x}_T^\top)^\dagger \mathbf{x}_T \mathbf{x}_T^\top (\Pi_{T-1} + \mathbf{x}_T \mathbf{x}_T^\top)^\dagger,
\end{aligned}$$

and plugging into (14) yields

$$\begin{aligned}
& \max_{\mathbf{x}_T} \mathbf{s}_{T-1}^\top (\Pi_{T-1} + \mathbf{x}_T \mathbf{x}_T^\top)^\dagger \mathbf{s}_{T-1} + \left( \mathbf{s}_{T-1}^\top (\Pi_{T-1} + \mathbf{x}_T \mathbf{x}_T^\top)^\dagger \mathbf{x}_T \right)^2 \\
& + B_T^2 \mathbf{x}_T^\top (\Pi_{T-1} + \mathbf{x}_T \mathbf{x}_T^\top)^\dagger \mathbf{x}_T - \sigma_{T-1}^2.
\end{aligned}$$

We need to proceed by cases. First, assume that  $\Pi_{T-1}$  is full rank. This implies that  $\mathbf{x}_T \in \mathcal{R}(\Pi_{T-1})$  and we can apply the second case of Lemma 9 to (14) and arrive at

$$\begin{aligned} \max_{\mathbf{x}_T} \mathbf{s}_{T-1}^\top \Pi_{T-1}^\dagger \mathbf{s}_{T-1} + \frac{\left(\mathbf{s}_{T-1}^\top \Pi_{T-1}^\dagger \mathbf{x}_T\right)^2}{1 - \mathbf{x}_T^\top \Pi_{T-1}^\dagger \mathbf{x}_T} + \left( \mathbf{s}_{T-1}^\top \Pi_{T-1}^\dagger \mathbf{x}_T + \frac{\mathbf{s}_{T-1}^\top \Pi_{T-1}^\dagger \mathbf{x}_T \mathbf{x}_T^\top \Pi_{T-1}^\dagger \mathbf{x}_T}{1 - \mathbf{x}_T^\top \Pi_{T-1}^\dagger \mathbf{x}_T} \right)^2 \\ + B_T^2 \left( \mathbf{x}_T^\top \Pi_{T-1}^\dagger \mathbf{x}_T + \frac{\left(\mathbf{x}_T^\top \Pi_{T-1}^\dagger \mathbf{x}_T\right)^2}{1 - \mathbf{x}_T^\top \Pi_{T-1}^\dagger \mathbf{x}_T} \right) - \sigma_{T-1}^2. \end{aligned}$$

Since we assumed that  $\mathbf{x}_T \in \mathcal{R}(\Pi_{T-1})$  and  $\mathbf{s}_{T-1} \in \mathcal{R}(\Pi_{T-1})$  by its definition, it is without loss of generality to reparameterize the problem with  $\mathbf{v} = \left(\Pi_{T-1}^\dagger\right)^{\frac{1}{2}} \mathbf{x}_T$  and  $\mathbf{w} = \left(\Pi_{T-1}^\dagger\right)^{\frac{1}{2}} \mathbf{s}_{T-1}$  to obtain

$$\begin{aligned} \max_{\mathbf{v}} \mathbf{w}^\top \mathbf{w} + \frac{(\mathbf{w}^\top \mathbf{v})^2}{1 - \mathbf{v}^\top \mathbf{v}} + \left( \mathbf{w}^\top \mathbf{v} + \frac{\mathbf{v}^\top \mathbf{w} \mathbf{v}^\top \mathbf{v}}{1 - \mathbf{v}^\top \mathbf{v}} \right)^2 + B_T^2 \mathbf{v}^\top \mathbf{v} + B_T^2 \frac{(\mathbf{v}^\top \mathbf{v})^2}{1 - \mathbf{v}^\top \mathbf{v}} - \sigma_{T-1}^2 \\ = \max_{\mathbf{v}} \mathbf{w}^\top \mathbf{w} + \frac{(\mathbf{w}^\top \mathbf{v})^2}{1 - \mathbf{v}^\top \mathbf{v}} \left( 1 + \frac{1}{1 - \mathbf{v}^\top \mathbf{v}} \right) + B_T^2 \frac{\mathbf{v}^\top \mathbf{v}}{1 - \mathbf{v}^\top \mathbf{v}} - \sigma_{T-1}^2. \end{aligned}$$

The objective is direction independent except for the  $\mathbf{w}^\top \mathbf{v}$  term, which implies that we should set  $\mathbf{v} = \alpha \mathbf{w}$  for some positive  $\alpha$ . Plugging in this value of  $\mathbf{v}$ , the optimization problem becomes finding  $\alpha^*$ , where

$$\begin{aligned} \alpha^* &= \operatorname{argmax}_{\alpha \geq 0} \alpha (\mathbf{w}^\top \mathbf{w})^2 \frac{2 - \alpha^2 \mathbf{w}^\top \mathbf{w}}{(1 - \alpha^2 \mathbf{w}^\top \mathbf{w})^2} + B_T^2 \frac{\alpha^2 \mathbf{w}^\top \mathbf{w}}{1 - \alpha^2 \mathbf{w}^\top \mathbf{w}} \\ &= \operatorname{argmax}_{\alpha \geq 0} \alpha \mathbf{w}^\top \mathbf{w} \frac{\mathbf{w}^\top \mathbf{w} + (\mathbf{w}^\top \mathbf{w} + B_T^2 \alpha)(1 - \alpha^2 \mathbf{w}^\top \mathbf{w})}{(1 - \alpha^2 \mathbf{w}^\top \mathbf{w})^2}. \end{aligned}$$

The objective goes to infinity as  $\alpha \rightarrow (\mathbf{w}^\top \mathbf{w})^{-\frac{1}{2}}$ , but fortunately the box constraints keep it bounded. The box condition is equivalent to

$$\begin{aligned} |\mathbf{x}_T^\top \mathbf{P}_T \mathbf{s}_{T-1}| &\leq B_T \\ \Leftrightarrow \left| \frac{\mathbf{x}_T^\top \Pi_{T-1}^\dagger \mathbf{s}_{T-1}}{1 - \mathbf{x}_T^\top \Pi_{T-1}^\dagger \mathbf{x}_T} \right| &\leq B_T \\ \Leftrightarrow \left| \frac{\alpha \mathbf{w}^\top \mathbf{w}}{1 - \alpha^2 \mathbf{w}^\top \mathbf{w}} \right| &\leq B_T. \end{aligned}$$

The left hand side is an increasing function of  $\alpha$  and the inequality is satisfied for  $\alpha = 0$ , and hence the inequality is satisfied for all  $\alpha < \alpha_{\max}$ , where

$$\alpha_{\max} = \sqrt{1 + \frac{4B_T}{\mathbf{w}^\top \mathbf{w}}} - 1,$$

the solution to  $\alpha \mathbf{w}^\top \mathbf{w} = (1 - \alpha^2 \mathbf{w}^\top \mathbf{w}) B_T$ . Importantly, this inequality implies that  $1 - \alpha^2 \mathbf{w}^\top \mathbf{w}$  is bounded below, and hence the maximizer for  $\alpha^*$  is well defined.

Hence, we have shown that, in the case when  $\mathbf{x}_T \in \mathcal{R}(\Pi_{T-1})$ ,

$$\begin{aligned} \max_{\mathbf{x}_T} \min_{\hat{\mathbf{y}}_T} \max_{\mathbf{y}_T} \mathbf{s}_T^\top \mathbf{P}_T \mathbf{s}_T - \sigma_T^2 \\ = \mathbf{s}_{T-1}^\top \Pi_{T-1}^\dagger \mathbf{s}_{T-1} \left( 1 + \alpha_T^* \frac{\mathbf{s}_{T-1}^\top \Pi_{T-1}^\dagger \mathbf{s}_{T-1} + \left( \mathbf{s}_{T-1}^\top \Pi_{T-1}^\dagger \mathbf{s}_{T-1} + B_T^2 \alpha_T^* \right) \left( 1 - (\alpha_T^*)^2 \mathbf{s}_{T-1}^\top \Pi_{T-1}^\dagger \mathbf{s}_{T-1} \right)}{\left( 1 - (\alpha_T^*)^2 \mathbf{s}_{T-1}^\top \Pi_{T-1}^\dagger \mathbf{s}_{T-1} \right)^2} \right) \\ - \sigma_{T-1}^2, \end{aligned}$$

where  $\alpha_T^*$ , a function of  $\mathbf{s}_{T-1}^\top \Pi_{T-1}^\dagger \mathbf{s}_{T-1}$  and  $B_T$ , is

$$\operatorname{argmin}_{0 \leq \alpha \leq \alpha_{\max}} \alpha \frac{\mathbf{s}_{T-1}^\top \Pi_{T-1}^\dagger \mathbf{s}_{T-1} + (\mathbf{s}_{T-1}^\top \Pi_{T-1}^\dagger \mathbf{s}_{T-1} + B_T^2 \alpha)(1 - \alpha^2 \mathbf{s}_{T-1}^\top \Pi_{T-1}^\dagger \mathbf{s}_{T-1})}{\left(1 - \alpha^2 \mathbf{s}_{T-1}^\top \Pi_{T-1}^\dagger \mathbf{s}_{T-1}\right)^2}$$

for  $\alpha_{\max} = \sqrt{1 + \frac{4B_T}{\mathbf{s}_{T-1}^\top \Pi_{T-1}^\dagger \mathbf{s}_{T-1}}} - 1$ .

In the case when  $\Pi_{T-1}$  is not full rank, the adversary has the option to play  $\mathbf{x}_T \notin \mathcal{R}(\Pi_{T-1})$ . In this case, applying Lemma 10 to every term yields

$$\max_{\mathbf{x}_T} \min_{\hat{\mathbf{y}}_T} \max_{\mathbf{y}_T} \mathbf{s}_T^\top \mathbf{P}_T \mathbf{s}_T - \sigma_T^2 = \mathbf{s}_{T-1}^\top \Pi_{T-1}^\dagger \mathbf{s}_{T-1} + B_T^2 - \sigma_{T-1}^2$$

for any  $\mathbf{x}_T \notin \mathcal{R}(\Pi_{T-1})$  with  $|\mathbf{x}_T \mathbf{P}_T \mathbf{s}_{T-1}| \leq B_T$ .

All in all, the backwards induction applied to the last round yields

$$\max_{\mathbf{x}_T} \min_{\hat{\mathbf{y}}_T} \max_{\mathbf{y}_T} \mathbf{s}_T^\top \mathbf{P}_T \mathbf{s}_T - \sigma_T^2 = \mathbf{s}_{T-1}^\top \Pi_{T-1}^\dagger \mathbf{s}_{T-1} - \sigma_{T-1}^2 + G$$

where

$$G = \begin{cases} \alpha_T^* \frac{\mathbf{s}_{T-1}^\top \Pi_{T-1}^\dagger \mathbf{s}_{T-1} + (\mathbf{s}_{T-1}^\top \Pi_{T-1}^\dagger \mathbf{s}_{T-1} + B_T^2 \alpha_T^*)(1 - (\alpha_T^*)^2 \mathbf{s}_{T-1}^\top \Pi_{T-1}^\dagger \mathbf{s}_{T-1})}{(1 - (\alpha_T^*)^2 \mathbf{s}_{T-1}^\top \Pi_{T-1}^\dagger \mathbf{s}_{T-1})^2} & \text{if } \Pi_{T-1} \text{ is full rank} \\ \max \left\{ B_T^2, \alpha_T^* \frac{\mathbf{s}_{T-1}^\top \Pi_{T-1}^\dagger \mathbf{s}_{T-1} + (\mathbf{s}_{T-1}^\top \Pi_{T-1}^\dagger \mathbf{s}_{T-1} + B_T^2 \alpha_T^*)(1 - (\alpha_T^*)^2 \mathbf{s}_{T-1}^\top \Pi_{T-1}^\dagger \mathbf{s}_{T-1})}{(1 - (\alpha_T^*)^2 \mathbf{s}_{T-1}^\top \Pi_{T-1}^\dagger \mathbf{s}_{T-1})^2} \right\} & \text{otherwise.} \end{cases}$$

□

We observe that, in the second case, the maximum could be either term, corresponding to the adversary playing  $\mathbf{x}_T \notin \mathcal{R}(\Pi_{T-1})$  or  $\mathbf{x}_T = \alpha_T^* \left( \Pi_{T-1}^\dagger \right)^{\frac{1}{2}} \mathbf{s}_{T-1}$ , respectively. However, in the later case, the value function obviously ceases to be quadratic and the next step of the backwards induction does in intractable.
